# Supplementary material
Source: HighWire-hosted journal article supplement (https://bmjopenquality.bmj.com/highwire/filestream/135984/field_highwire_adjunct_files/0/ds1615.docx)
Supplement: ds1615.docx [file ds1615.docx]

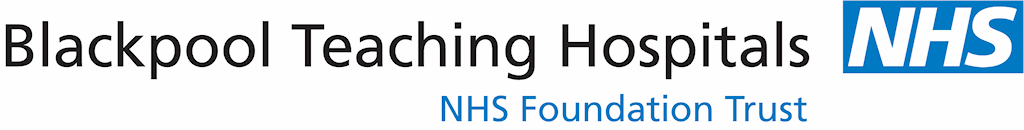


**Incidents Reported 2010 – 2012 – Obstetrics and Gynaecology**

|  | Jan | Feb | March | April | May | June | July | August | Sept | Oct | Nov | Dec | Total |
| --- | --- | --- | --- | --- | --- | --- | --- | --- | --- | --- | --- | --- | --- |
| 2010 | 89 | 86 | 62 | 52 | 69 | 72 | 51 | 56 | 71 | 40 | 61 | 46 | 755 |
| 2011 | 47 | 40 | 43 | 77 | 88 | 70 | 68 | 71 | 59 | 82 | 87 | 50 | 782 |
| 2012 | 57 | 73 | 65 | 77 | 90 | 118 | 75 | 127 | 86 | 156 | 113 | 93 | 1130 |

**Serious Incidents Reported 2010 – 2012 Obstetrics and Gynaecology**

|  | Jan | Feb | March | April | May | June | July | August | Sept | Oct | Nov | Dec | Total |
| --- | --- | --- | --- | --- | --- | --- | --- | --- | --- | --- | --- | --- | --- |
| 2010 | 14 | 7 | 4 | 7 | 8 | 5 | 7 | 0 | 11 | 7 | 8 | 4 | 82 |
| 2011 | 4 | 8 | 8 | 2 | 13 | 6 | 2 | 3 | 4 | 3 | 3 | 0 | 56 |
| 2012 | 3 | 4 | 3 | 4 | 5 | 4 | 1 | 3 | 0 | 3 | 4 | 2 | 36 |
